# Supplementary material for: Pollen Food Allergy Syndrome in Allergic March
Source: MDPI journal article supplement (doi:10.3390/nu14132658), 2022-06-27
Supplement: s1 [file s1]

**Table S1.** Definition of exposures and outcomes

| Exposures                                           | Definitions                                                                                                                                                                                                           |
|-----------------------------------------------------|-----------------------------------------------------------------------------------------------------------------------------------------------------------------------------------------------------------------------|
| Wheeze current at 5 years of age                    | A positive answer from the caregiver to the question (child at 5 y old), “Has your child ever had wheezing or whistling in the past 12 months?”                                                                       |
| Wheeze current at 9 years of age                    | A positive answer from the caregiver to the question (child at 9 y old), “Has your child ever had wheezing or whistling in the past 12 months?”                                                                       |
| Eczema current at 5 years of age                    | A positive answer from the caregiver to the question (child at 5 y old), “Has your child ever had itchy eczema in the past 12 months?”                                                                                |
| Eczema current at 9 years of age                    | A positive answer from the caregiver to the question (child at 9 y old), “Has your child ever had itchy eczema in the past 12 months?”                                                                                |
| Rhinitis current at 5 years of age                  | A positive answer from the caregiver to the question (child at 5 y old), “In the past 12 months, has your child had a problem with sneezing, or a runny, or blocked nose when he/she did not have a cold or the flu?” |
| Rhinitis current at 9 years of age                  | A positive answer from the caregiver to the question (child at 9 y old), “In the past 12 months, has your child had a problem with sneezing, or a runny, or blocked nose when he/she did not have a cold or the flu?” |
| Pan-allergen sensitization status at 5 years of age | Specific IgE $\geq$ 0.3 ISU for any pan-allergen (child at 5 y old) was considered positive. Specific IgE antibody levels were measured within the range of 0.3–100 ISU-E (ISAC standardized units).                  |
| Pan-allergen sensitization status at 9 years of age | Specific IgE $\geq$ 0.3 ISU for any pan-allergen (child at 9 y old) was considered positive. Specific IgE antibody levels were measured within the range of 0.3–100 ISU-E (ISAC standardized units).                  |

|                                                 |                                                                                                                                                                                             |
|-------------------------------------------------|---------------------------------------------------------------------------------------------------------------------------------------------------------------------------------------------|
| Sensitization to Bet v1 sIgE at 5 years of age  | Specific IgE $\geq$ 0.3 ISU for Bet v1 (child at 5 y old) was considered positive. Specific IgE antibody levels were measured within the range of 0.3–100 ISU-E (ISAC standardized units).  |
| Sensitization to Bet v1 sIgE at 9 years of age  | Specific IgE $\geq$ 0.3 ISU for Bet v1 (child at 9 y old) was considered positive. Specific IgE antibody levels were measured within the range of 0.3–100 ISU-E (ISAC standardized units).  |
| Sensitization to Cry j 1 sIgE at 5 years of age | Specific IgE $\geq$ 0.3 ISU for Cry j 1 (child at 5 y old) was considered positive. Specific IgE antibody levels were measured within the range of 0.3–100 ISU-E (ISAC standardized units). |
| Sensitization to Cry j 1 sIgE at 9 years of age | Specific IgE $\geq$ 0.3 ISU for Bet v1 (child at 9 y old) was considered positive. Specific IgE antibody levels were measured within the range of 0.3–100 ISU-E (ISAC standardized units).  |
| Sensitization to Der p 1 sIgE at 5 years of age | Specific IgE $\geq$ 0.3 ISU for Der p 1 (child at 5 y old) was considered positive. Specific IgE antibody levels were measured within the range of 0.3–100 ISU-E (ISAC standardized units). |
| Sensitization to Der p 1 sIgE at 9 years of age | Specific IgE $\geq$ 0.3 ISU for Der p 1 (child at 9 y old) was considered positive. Specific IgE antibody levels were measured within the range of 0.3–100 ISU-E (ISAC standardized units). |
| Sensitization to Der f 1 sIgE at 5 years of age | Specific IgE $\geq$ 0.3 ISU for Der f 1 (child at 5 y old) was considered positive. Specific IgE antibody levels were measured within the range of 0.3–100 ISU-E (ISAC standardized units). |
| Sensitization to Der f 1 sIgE at 9 years of age | Specific IgE $\geq$ 0.3 ISU for Der f 1 (child at 9 y old) was considered positive. Specific IgE antibody levels were measured within the range of 0.3–100 ISU-E (ISAC standardized units). |
| Sensitization to Can f 1 sIgE at 5 years of age | Specific IgE $\geq$ 0.3 ISU for Can f 1 (child at 5 y old) was considered positive. Specific IgE antibody levels were measured within the range of 0.3–100 ISU-E (ISAC standardized units). |
| Sensitization to Can f 1 sIgE at 9 years of age | Specific IgE $\geq$ 0.3 ISU for Can f 1 (child at 9 y old) was considered positive. Specific IgE antibody levels were measured within the range of 0.3–100 ISU-E (ISAC standardized units). |

|                                                 |                                                                                                                                                                                                         |
|-------------------------------------------------|---------------------------------------------------------------------------------------------------------------------------------------------------------------------------------------------------------|
| Sensitization to Fel d 1 sIgE at 5 years of age | Specific IgE $\geq$ 0.3 ISU for Fel d 1 (child at 5 y old) was considered positive. Specific IgE antibody levels were measured within the range of 0.3–100 ISU-E (ISAC standardized units).             |
| Sensitization to Fel d 1 sIgE at 9 years of age | Specific IgE $\geq$ 0.3 ISU for Fel d 1 (child at 9 y old) was considered positive. Specific IgE antibody levels were measured within the range of 0.3–100 ISU-E (ISAC standardized units).             |
| Outcomes                                        | Definitions                                                                                                                                                                                             |
| Hay fever                                       | A positive answer from the caregiver to the question (child at 13y old), "Has your child ever had hay fever?" (Hay fever ever at 13y)                                                                   |
| OAS                                             | A positive answer from the caregiver to the question (child at 13y old), "Has your child ever had an itchy mouth or redness around his/her mouth after eating fruits and vegetables?" (OAS ever at 13y) |
| Pollen allergy                                  | "Hay fever ever at 13y" and "sensitization to pan allergens"                                                                                                                                            |
| PFAS                                            | "Pollen allergy ever at 13y" and "OAS ever at 13y"                                                                                                                                                      |

IgE, immunoglobulin E; ISAAC: international study of asthma and allergies in childhood; OAS, Oral allergy syndrome; PFAS, pollen-food allergy syndrome

**Table S2.** Pan-allergens for the analysis in this study

| Allergen     | Species                                    | Protein family              |
|--------------|--------------------------------------------|-----------------------------|
| Act d 1      | Actinidia deliciosa (Kiwi)                 | Cysteine protease           |
| Act d 2      | Actinidia deliciosa (Kiwi)                 | Thaumatococcus-like protein |
| Act d 5      | Actinidia deliciosa (Kiwi)                 | Kiwifruit                   |
| Act d 8      | Actinidia deliciosa (Kiwi)                 | PR-10                       |
| Aln g 1      | Alnus glutinosa (Alder)                    | PR-10                       |
| Amb a 1      | Ambrosia artemisiifolia (Ragweed)          | Pectate lyase               |
| Api g 1      | Apium graveolens (Celery)                  | PR-10                       |
| Ara h 8      | Arachis hypogaea (Peanut)                  | PR-10                       |
| Art v 1      | Artemisia vulgaris (Mugwort)               | Defensin                    |
| Art v 3      | Artemisia vulgaris (Mugwort)               | LTP                         |
| Bet v 1      | Betula verrucosa (Birch)                   | PR-10                       |
| Bet v 2      | Betula verrucosa (Birch)                   | Profilin                    |
| Bet v 4      | Betula verrucosa (Birch)                   | Polcalcin                   |
| Cor a 1.0101 | Corylus avellana (Hazelnut)                | PR-10                       |
| Cor a 1.0401 | Corylus avellana (Hazelnut)                | PR-10                       |
| Cor a 8      | Corylus avellana (Hazelnut)                | nLTP                        |
| Cry j 1      | Cryptomeria japonica (Japanese cedar)      | Pectate lyase               |
| Cup a 1      | Cupressus arizonica (Cypress)              | Pectate lyase               |
| Cyn d 1      | Cynodon dactylon (Bermuda grass)           | Beta-expansin               |
| Gly m 4      | Glycine max (Soybean)                      | PR-10                       |
| Mal d 1      | Malus domestica (Apple)                    | PR-10                       |
| Mer a 1      | Mercurialis annua (Annual mercury)         | Profilin                    |
| Ole e 1      | Olea europaea (Olive)                      | Olive Group 1               |
| Par j 2      | Parietaria judaica (Pellitory of the wall) | nLTP                        |
| Phl p1       | Phleum pratense (Timothy)                  | Beta-expansin               |
| Phl p 2      | Phleum pratense (Timothy)                  | Grass group II              |
| Phl p 4      | Phleum pratense (Timothy)                  | Berberine bridge enzyme     |
| Phl p 5      | Phleum pratense (Timothy)                  | Grass group V               |
| Phl p 6      | Phleum pratense (Timothy)                  | Grass group VI              |
| Phl p 7      | Phleum pratense (Timothy)                  | Polcalcin                   |

|          |                                 |                         |
|----------|---------------------------------|-------------------------|
| Phl p 11 | Phleum pratense (Timothy)       | Ole e 1-related protein |
| Phl p 12 | Phleum pratense (Timothy)       | Profilin                |
| Pla a 1  | Platanus acerifolia (Plane)     | Invertase inhibitor     |
| Pru p 1  | Prunus persica (Peach)          | PR-10                   |
| Pru p 3  | Prunus persica (Peach)          | nLTP                    |
| Sal k 1  | Salsola komarovii<br>(Saltwort) | Pectin methylesterase   |

**Table S3.** Comparison of basal characteristics between the included and excluded participants

|                                    | Data included in the analysis |     |      | Data not included in the analysis |      |              |
|------------------------------------|-------------------------------|-----|------|-----------------------------------|------|--------------|
| Variables                          | Category                      | N   | %    | N                                 | %    | P            |
| Sex                                | male                          | 259 | 49.7 | 551                               | 53.5 | 0.169        |
|                                    | female                        | 262 | 50.3 | 478                               | 46.5 |              |
|                                    | missing                       | 0   |      | 0                                 |      |              |
| Wheeze current at 5 years of age   | no                            | 414 | 80.9 | 582                               | 85.3 | <b>0.048</b> |
|                                    | yes                           | 98  | 19.1 | 100                               | 14.7 |              |
|                                    | missing                       | 9   |      | 347                               |      |              |
| Eczema current at 5 years of age   | no                            | 384 | 75   | 507                               | 74.4 | 0.881        |
|                                    | yes                           | 128 | 25   | 174                               | 25.6 |              |
|                                    | missing                       | 9   |      | 348                               |      |              |
| Rhinitis current at 5 years of age | no                            | 314 | 61.3 | 460                               | 67.4 | <b>0.033</b> |
|                                    | yes                           | 198 | 38.7 | 222                               | 32.6 |              |
|                                    | missing                       | 9   |      | 347                               |      |              |
| Wheeze current at 9 years of age   | no                            | 461 | 89.2 | 362                               | 92.8 | 0.078        |
|                                    | yes                           | 56  | 10.8 | 28                                | 7.2  |              |
|                                    | missing                       | 4   |      | 639                               |      |              |
| Eczema current at 9 years of age   | no                            | 409 | 79.1 | 314                               | 80.7 | 0.607        |
|                                    | yes                           | 108 | 20.9 | 75                                | 19.3 |              |
|                                    | missing                       | 4   |      | 640                               |      |              |
| Rhinitis current at 9 years of age | no                            | 226 | 43.7 | 189                               | 48.5 | 0.175        |
|                                    | yes                           | 291 | 56.3 | 201                               | 51.5 |              |
|                                    | missing                       | 4   |      | 639                               |      |              |
| Pet keeping at 6 months            | no                            | 419 | 81.5 | 674                               | 76.5 | <b>0.034</b> |
|                                    | yes                           | 95  | 18.5 | 207                               | 23.5 |              |
|                                    | missing                       | 7   |      | 148                               |      |              |
| Smoking exposure at 5 years of age | no                            | 379 | 74.3 | 477                               | 70.1 | 0.129        |
|                                    | yes                           | 131 | 25.7 | 203                               | 29.9 |              |
|                                    | missing                       | 11  |      | 349                               |      |              |
| Siblings                           | no                            | 316 | 61   | 437                               | 51.4 | <b>0.001</b> |
|                                    | yes                           | 202 | 39   | 413                               | 48.6 |              |
|                                    | missing                       | 3   |      | 179                               |      |              |
| Maternal history of allergy        | no                            | 185 | 36.9 | 417                               | 42.4 | <b>0.049</b> |
|                                    | yes                           | 316 | 63.1 | 567                               | 57.6 |              |
|                                    | missing                       | 20  |      | 45                                |      |              |
| Paternal history of allergy        | no                            | 250 | 50.1 | 531                               | 55   | 0.083        |
|                                    | yes                           | 249 | 49.9 | 434                               | 45   |              |
|                                    | missing                       | 22  |      | 64                                |      |              |
| Maternal history of rhinitis       | no                            | 241 | 48.5 | 552                               | 56.2 | <b>0.006</b> |
|                                    | yes                           | 256 | 51.5 | 430                               | 43.8 |              |
|                                    | missing                       | 24  |      | 47                                |      |              |
| Paternal history of                | no                            | 307 | 61.8 | 630                               | 65.3 | 0.204        |

|                             |         |     |      |     |      |       |
|-----------------------------|---------|-----|------|-----|------|-------|
| rhinitis                    | yes     | 190 | 38.2 | 335 | 34.7 |       |
|                             | missing | 24  |      | 64  |      |       |
| Income < 4,000,000 yen/year | no      | 435 | 93.3 | 880 | 92.7 | 0.752 |
|                             | yes     | 31  | 6.7  | 69  | 7.3  |       |
|                             | missing | 55  |      | 80  |      |       |
